# Supplementary material for: Achieving high performance poly(vinylidene fluoride) dielectric composites via in situ polymerization of polypyrrole nanoparticles on hydroxylated BaTiO3 particles
Source: Royal Society of Chemistry journal article supplement (doi:10.1039/c9sc01965k), 2019-01-01
Supplement: c9sc01965k1.pdf [file c9sc01965k1.pdf]

## Supporting Information

### **Achieving high performance poly(vinylidene fluoride) dielectric composites via *in-situ* polymerization of polypyrrole nanoparticles on hydroxylated-BaTiO<sub>3</sub> particles**

Xu Xie,<sup>1</sup> Zhen-zhen He,<sup>1</sup> Xiao-dong Qi,<sup>1</sup> Jing-hui Yang,<sup>1</sup> Yan-zhou Lei,<sup>2</sup> Yong Wang\*<sup>1</sup>

1. School of Materials Science & Engineering, Key Laboratory of Advanced Technologies of Materials (Ministry of Education), Southwest Jiaotong University, Chengdu, 610031, China
2. Analytical and Testing Center, Southwest Jiaotong University, Chengdu, 610031, China

#### ● **Experimental Part**

##### **Microstructure characterizations**

A thermal gravimetric analysis (TGA) TG 209 F3 Tarsus (Netzsch, Germany) was used to detect the hydroxylation degree of BT. During the measurements, sample of about 8 mg was initially preserved at 100 °C for 3 min to eliminate the moisture. Then, the sample was quickly cooled down to 30 °C. After that, the sample was heated to 800 °C at a heating rate of 10 °C/min. The measurements were carried out in nitrogen atmosphere.

A differential scanning calorimeter (DSC) STA449C Jupiter (Netzsch, Germany) was used to investigate the melting and crystallization behaviors of the composite samples. During the measurement, sample of about 8 mg was heated from 30 °C to 200 °C at a heating rate of 10 °C/min and maintained at 200 °C for 3 min to erase thermal history, then the sample was cooled down to 30 °C at a cooling rate of 5 °C/min. The measurements were carried out in nitrogen atmosphere.

##### **Thermal conductivity measurements**

The thermal conductivity of sample was measured on a Transient Hot Disk TPS 2500S instrument (Hot Disk AB, Gothenburg, Sweden) according to the international measuring standard ISO/CD 22007-2.

---

\* Corresponding author: Tel: +86 28 87603042;  
E-mail: [yongwang1976@163.com](mailto:yongwang1976@163.com)

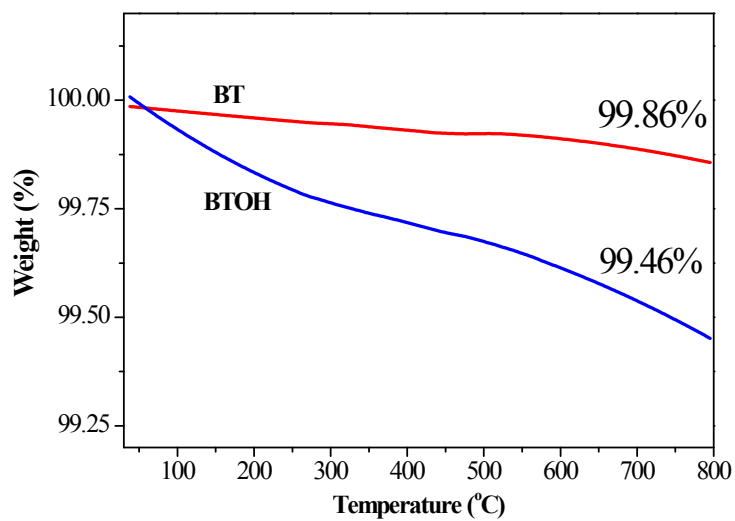

**Figure S1.** TGA curves of the BT and BTOH nanoparticles as prepared.

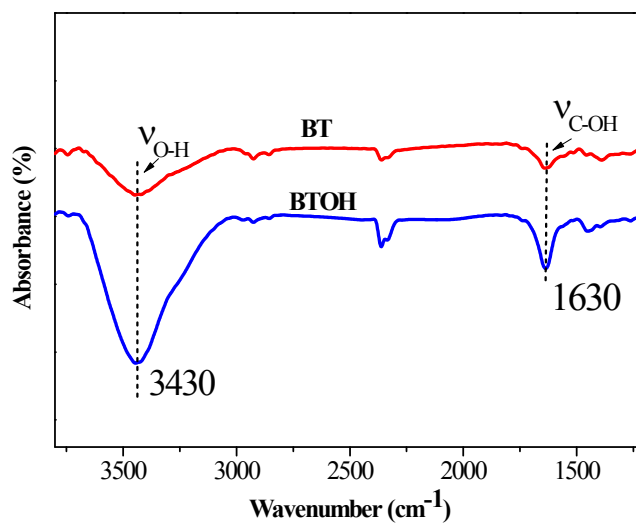

**Figure S2.** FTIR spectra of BT and BTOH particles as obtained.

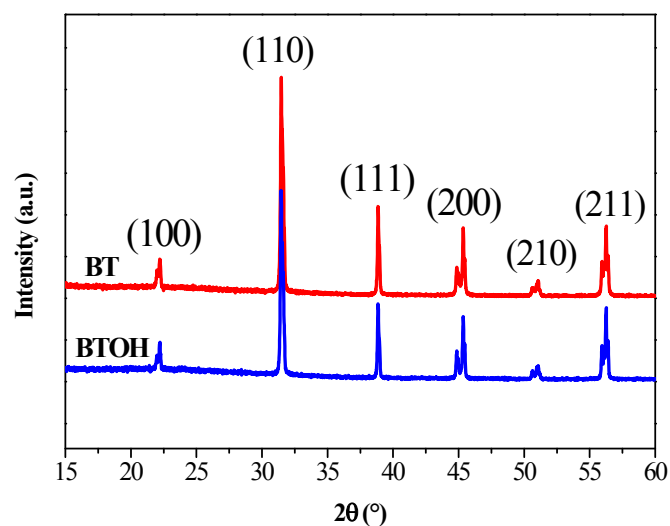

**Figure S3.** WAXD profiles of the BT and BTOH particles as obtained.

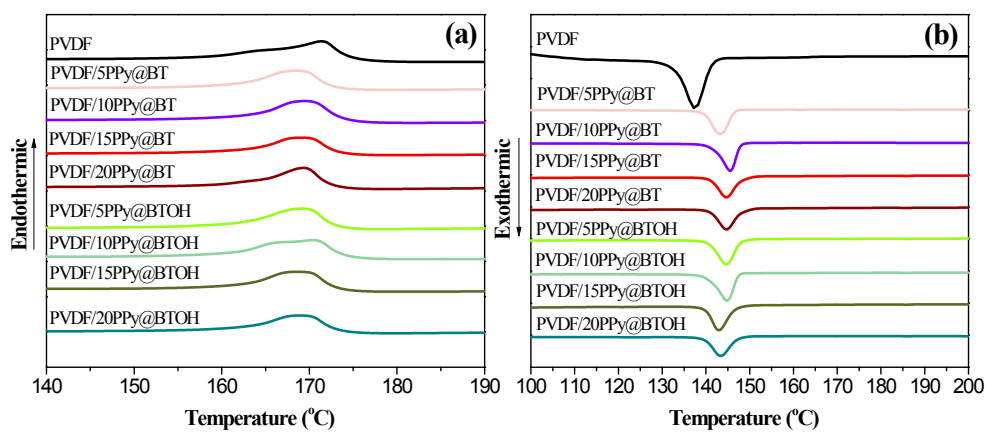

**Figure S4.** DSC heating curves (a) and cooling curves (b) showing the melting and crystallization behaviors of the PVDF/PPy@BT and PVDF/PPy@BTOH composites.

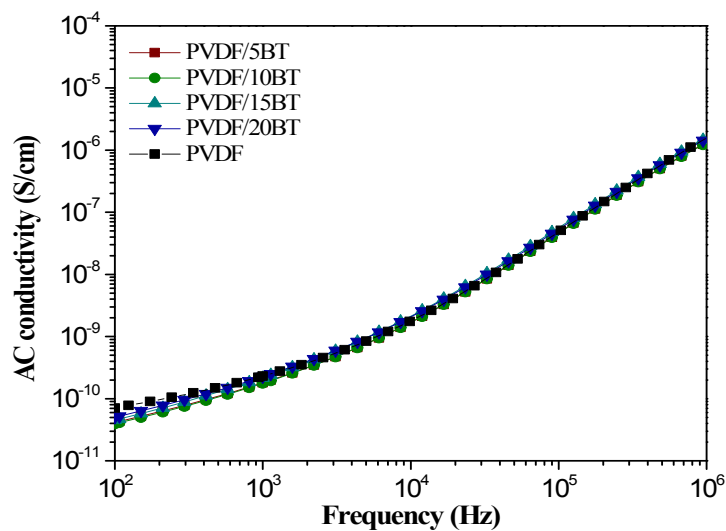

**Figure S5.** Variation of electrical conductivity of the PVDF/BT composites with increasing BT content.

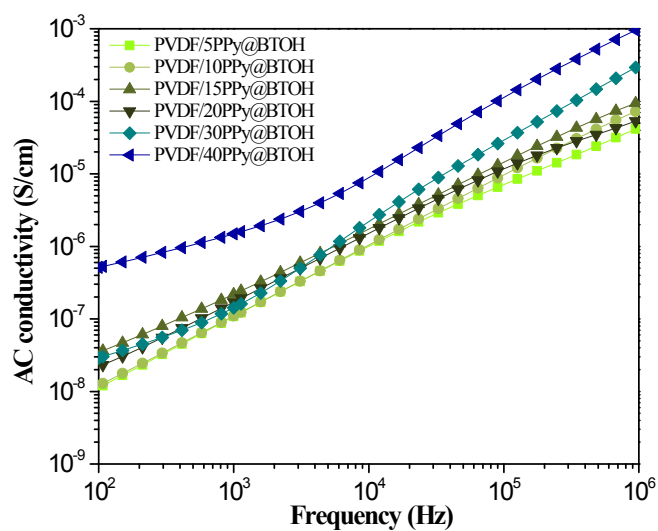

**Figure S6.** Variation of the AC conductivity of the PVDF/PPy@BTOH composites with increasing content of PPy@BTOH composite particles.

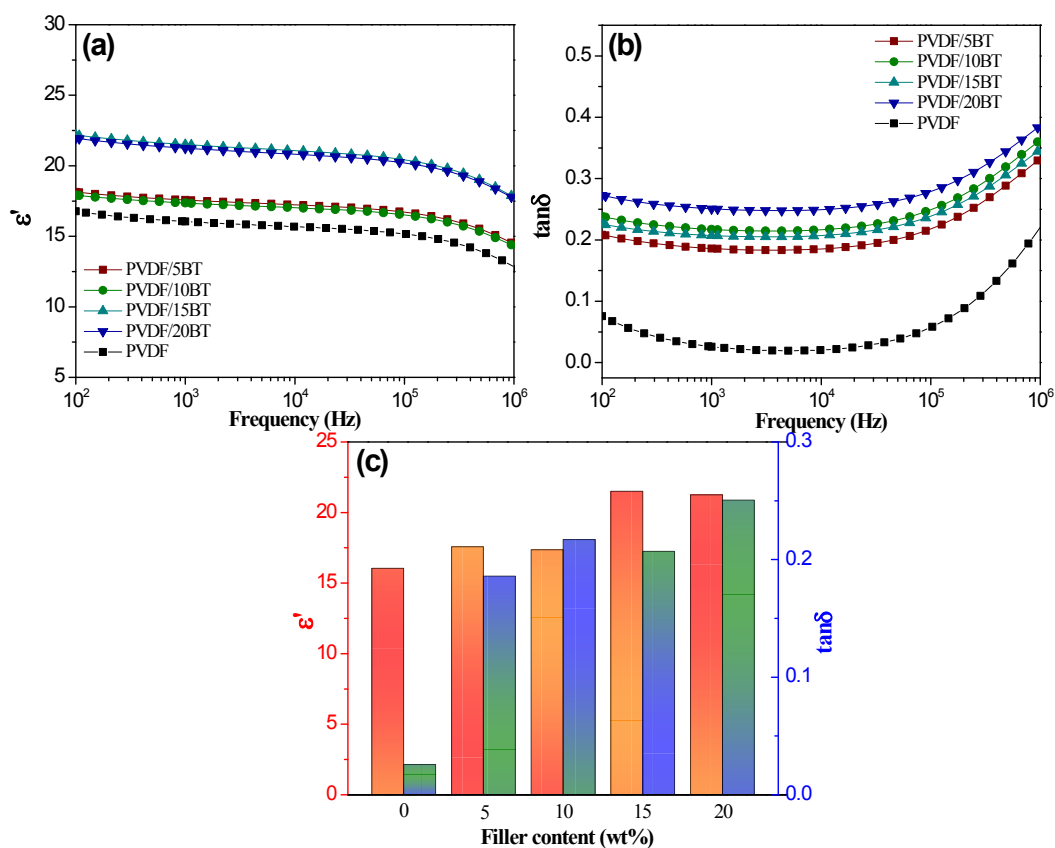

**Figure S7.** (a) Dielectric constant and (b) dielectric loss of the pure PVDF and PVDF/BT composites, and (c) showing the comparison of dielectric constant and dielectric loss of samples obtained at 1000 Hz.

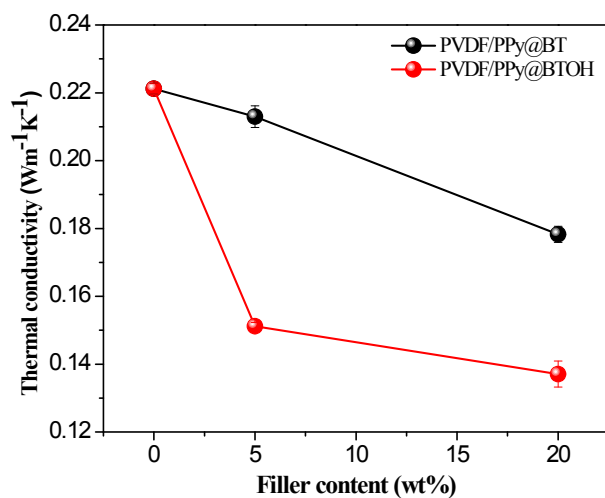

**Figure S8.** Comparison of the thermal conductivities between the PVDF/PPy@BT and

PVDF/PPy@BTOH composites.
